# Supplementary material
Source: PubMed Central journal article supplement (PMC7354227)
Supplement: NIHMS1595122-supplement-10.pdf [file NIHMS1595122-supplement-10.pdf]

**Table S6.** A list of primers and gRNA sequences used in this study, related to STAR Methods.

| Names of gRNA or primer | Sequence 5'-3'                        | Purpose                                                | Information                                                                 |
|-------------------------|---------------------------------------|--------------------------------------------------------|-----------------------------------------------------------------------------|
| NSGT_no_deletion F1     | AGTCTTTGAGTTGCCACAA                   | NSGT haplotype V deletion genotyping                   | Three-primer PCR (F1, F2 and R1)                                            |
| NSGT_common R1          | GTGTACGTAATGACAGTCGACT                | NSGT haplotype V deletion genotyping                   | The product from deletion haplotype is about 3.5kb                          |
| NSGT_deletion F2        | TACTAGAGAGCTCATACACAGGC               | NSGT haplotype V deletion genotyping                   | and without deletion is about 2 kb.                                         |
| fw3.2_dup F1            | GCTCCTGGATGTGTATCAGGTGAC              | fw3.2 duplication genotyping                           | F1+R1 amplifies from single-copy and duplication;                           |
| fw3.2_dup F2            | AACGCCATCCAGAGAAGACGAAC               | fw3.2 duplication genotyping                           | F2+R1 only amplifies in duplication (~300bp product).                       |
| fw3.2_dup R1            | CTA CAG GAA CTA TGA AAC TGT GTA CTC   | fw3.2 duplication genotyping                           |                                                                             |
| fw3.2-F1                | CACGCTCTGGTCTTCTCCACACC               | SIKLUH genotyping                                      | WT band is 690bp                                                            |
| fw3.2-R1                | CCCTTTTACCCTAACATGTCCATCGG            | SIKLUH genotyping                                      |                                                                             |
| MADS1_geno-F1           | CACAATTGATGCTGGATCAGC                 | eJ2 weak allele genotyping                             |                                                                             |
| MADS1_geno-R1           | CGGAGTAATCTATTAGATTCTGC               | eJ2 weak allele genotyping                             |                                                                             |
| SLK_RT-F                | TTACTTTTCTAAGAGAAGAAATGG              | j2 transposon allele genotyping                        |                                                                             |
| j2_geno2_rev            | CCGTCTTTCTGTTTGTAGC                   | j2 transposon allele genotyping                        |                                                                             |
| j2_geno4_rev            | GAATCCACTTAAGAACTCTTACC               | j2 transposon allele genotyping                        |                                                                             |
| 00g179240_F             | ATGGTTCGAGGTAACCCAG                   | sb1 CR-1 allele genotyping/ STM3 sequencing            | Digest PCR product with BslI, WT (367bp+22bp)/Mut (389bp)                   |
| sb1_ch01-1-R            | ATTATATCTGGATGAAGTACAACC              | sb1 CR-1 allele genotyping/ STM3 sequencing            |                                                                             |
| CR-STM3-geno-F2         | AGTACTAATCCCTCATCTAGA                 | sb1 CR-1 genotyping                                    | Digest PCR product with BslI, WT (242+138)/Mut (380)                        |
| CR-11-geno R1           | AGATCTGATACGATCTGAACG                 | sb1 CR-1 genotyping                                    |                                                                             |
| SL3.0-RB-R              | ATCAAACCTCATTAGTCAAGAAGC              | Genotyping/sequencing of TM3 in sb1 CR-1               | PCR amplification of TM3 specific region, forward primer is CR-STM3-geno-F2 |
| STM3_3p-R               | TTCATATAGTTTCTCTGGAG                  | Genotyping/sequencing of TM3 in sb1 CR-1               | Sequencing primer for TM3 PCR product                                       |
| Jip56-TM3_F5            | TTGGGCTGTTAAAAGGTTACAGG               | sb1 CR-del genotyping                                  | No amplification in WT, 625bp in mutant                                     |
| Jip56-TM3_R             | CTCAGTGTGACATATTCTCATCAT TTCTAGTGTCCG | sb1 CR-del genotyping                                  |                                                                             |
| RT-PCR-STM3-F3          | TCAATCTGGATATTGAGC                    | qRT-PCR                                                |                                                                             |
| RT-PCR-STM3-R3          | AGACTTGCATCTTTGAGCC                   | qRT-PCR                                                |                                                                             |
| RT-PCR-TM3-F4           | TACAGTATATGCAGCATGAG                  | qRT-PCR                                                |                                                                             |
| RT-PCR-TM3-R4           | TTAGTCGCTCAACCTGTTC                   | qRT-PCR                                                |                                                                             |
| qRT-UbI-middle-F        | CGTGGTGTGCTAAGAAGAG                   | qRT-PCR                                                |                                                                             |
| qRT-UbI-middle-R        | ACGAAGCCTCTGAACCTTTC                  | qRT-PCR                                                |                                                                             |
| Solyc03g114940_gRNA1    | ATGAAGAGAAGAGATTTTC                   | CRISPR guide targeting <i>KLUH</i> exon1               |                                                                             |
| Solyc03g114940_gRNA2    | CTTGAAGCTGAATCGTTAA                   | CRISPR guide targeting <i>KLUH</i> exon1               |                                                                             |
| Solyc03g114940_gRNA3    | AGTATTCTCTCGAGTTTC                    | CRISPR guide targeting <i>KLUH</i> exon1               |                                                                             |
| Solyc03g114940_gRNA4    | ACTGTTCTTCACAGAGCGA                   | CRISPR guide targeting <i>KLUH</i> exon1               |                                                                             |
| sb1_gRNA1               | GAAAGTAACTTGTCGCTTG                   | CRISPR guide targeting the <i>STM3/TM3</i> common exon |                                                                             |
| sb1_gRNA2               | GTCTCTATACGCCCTCATCT                  | CRISPR guide targeting the <i>STM3/TM3</i> common exon |                                                                             |
| sb1_gRNA3               | GCATCAGCATCTAACACGA                   | CRISPR guide flanking <i>STM3/TM3</i> locus            |                                                                             |
| sb1_gRNA4               | GTATTATTCTTATACACTT                   | CRISPR guide flanking <i>STM3/TM3</i> locus            |                                                                             |
| sb1_gRNA5               | GCCTACATACACTGTGTCGG                  | CRISPR guide flanking <i>STM3/TM3</i> locus            |                                                                             |
| sb1_gRNA6               | CTTTGTGATGGCCCTATAA                   | CRISPR guide flanking <i>STM3/TM3</i> locus            |                                                                             |
