# Supplementary material
Source: PubMed Central journal article supplement (PMC7354227)

# Figure S1

**A**

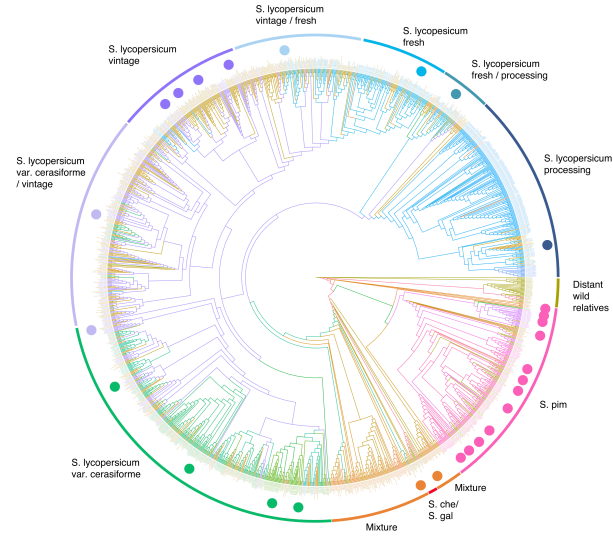

**B**

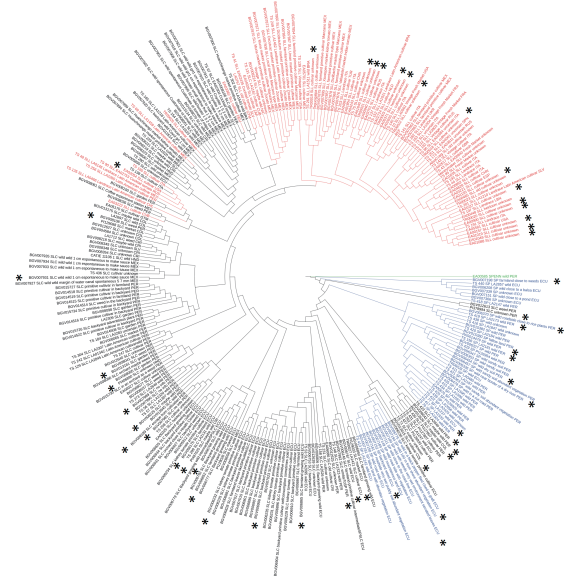

**C**

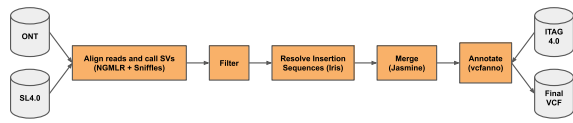

**E**

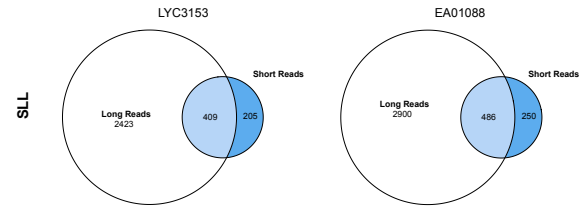

**D**

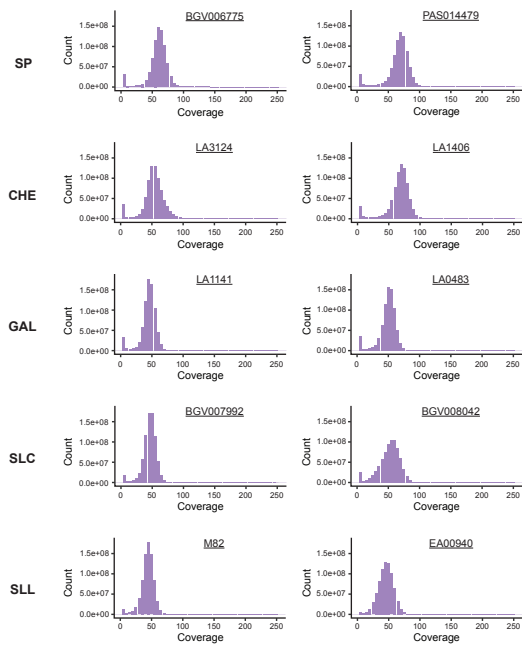

**F**

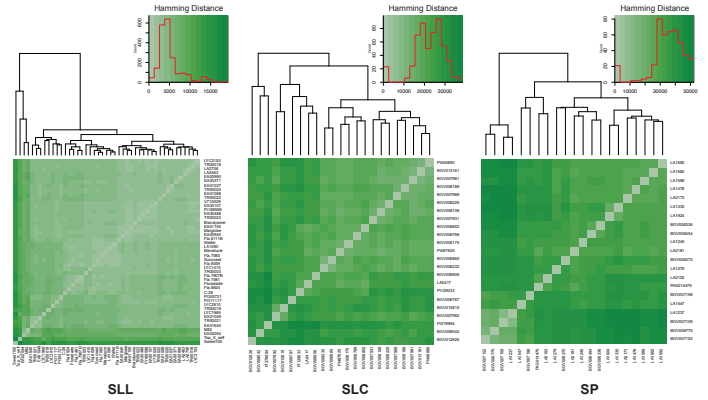

Supplement: NIHMS1595122-supplement-1.pdf [file NIHMS1595122-supplement-1.pdf]

**Figure S6**

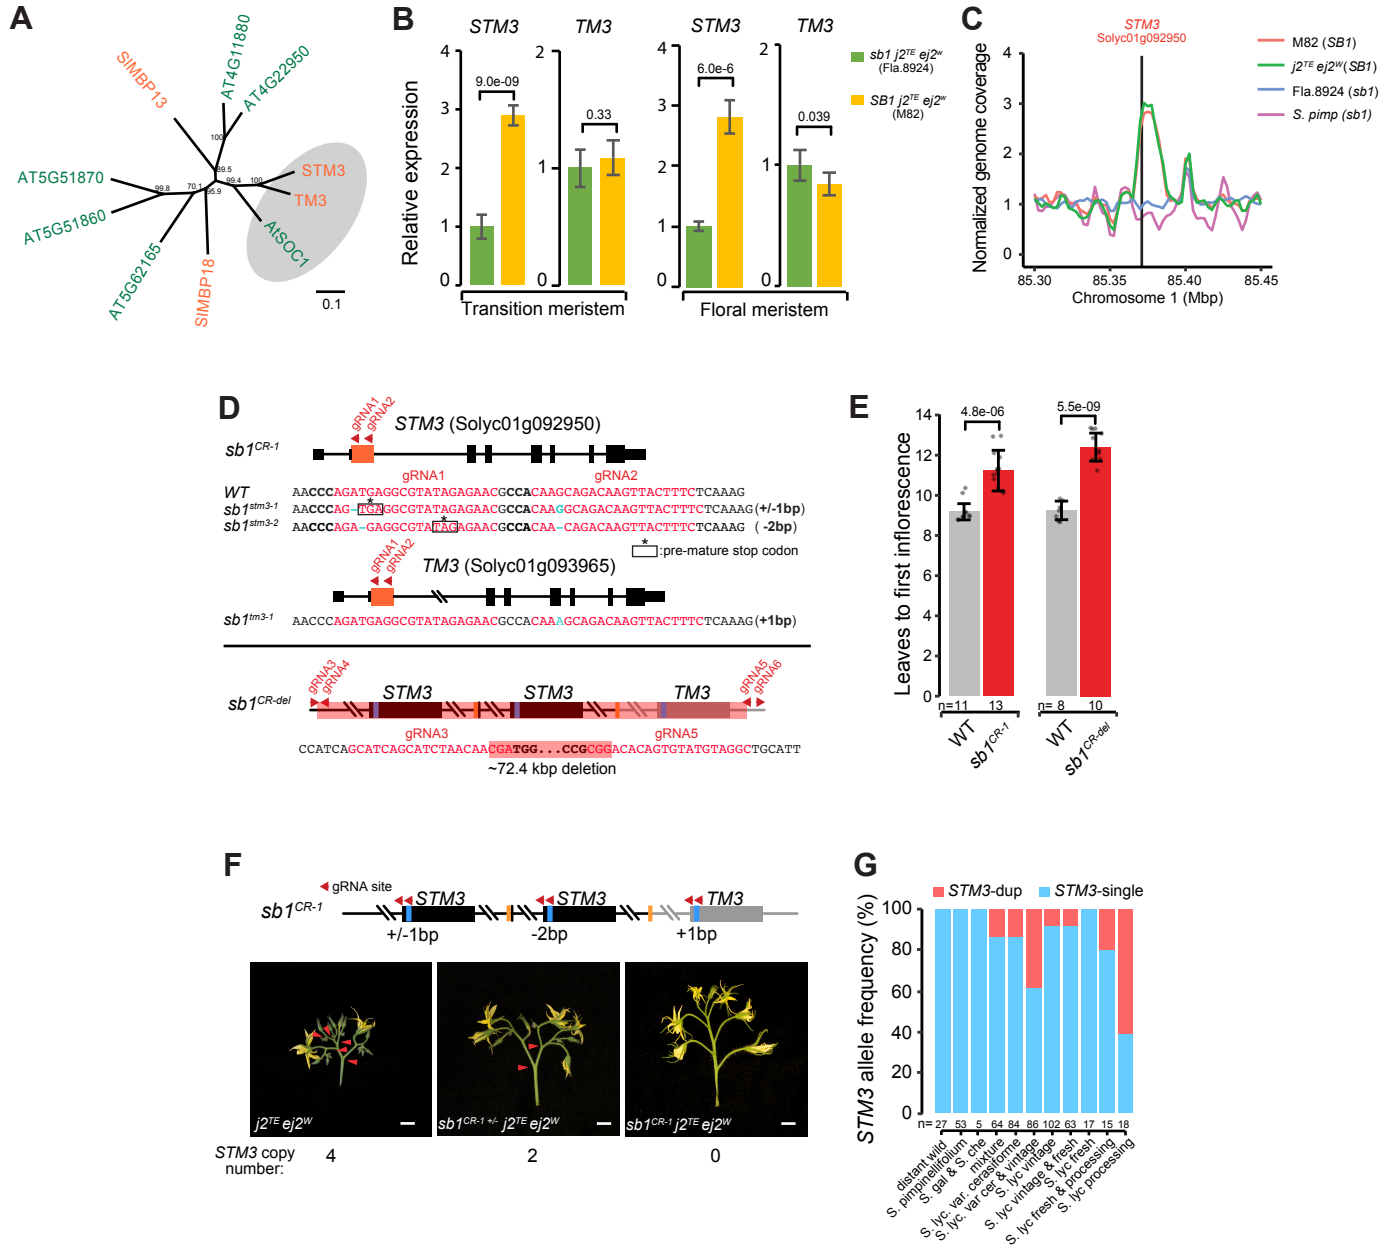

Supplement: NIHMS1595122-supplement-12.pdf [file NIHMS1595122-supplement-12.pdf]

# Figure S2

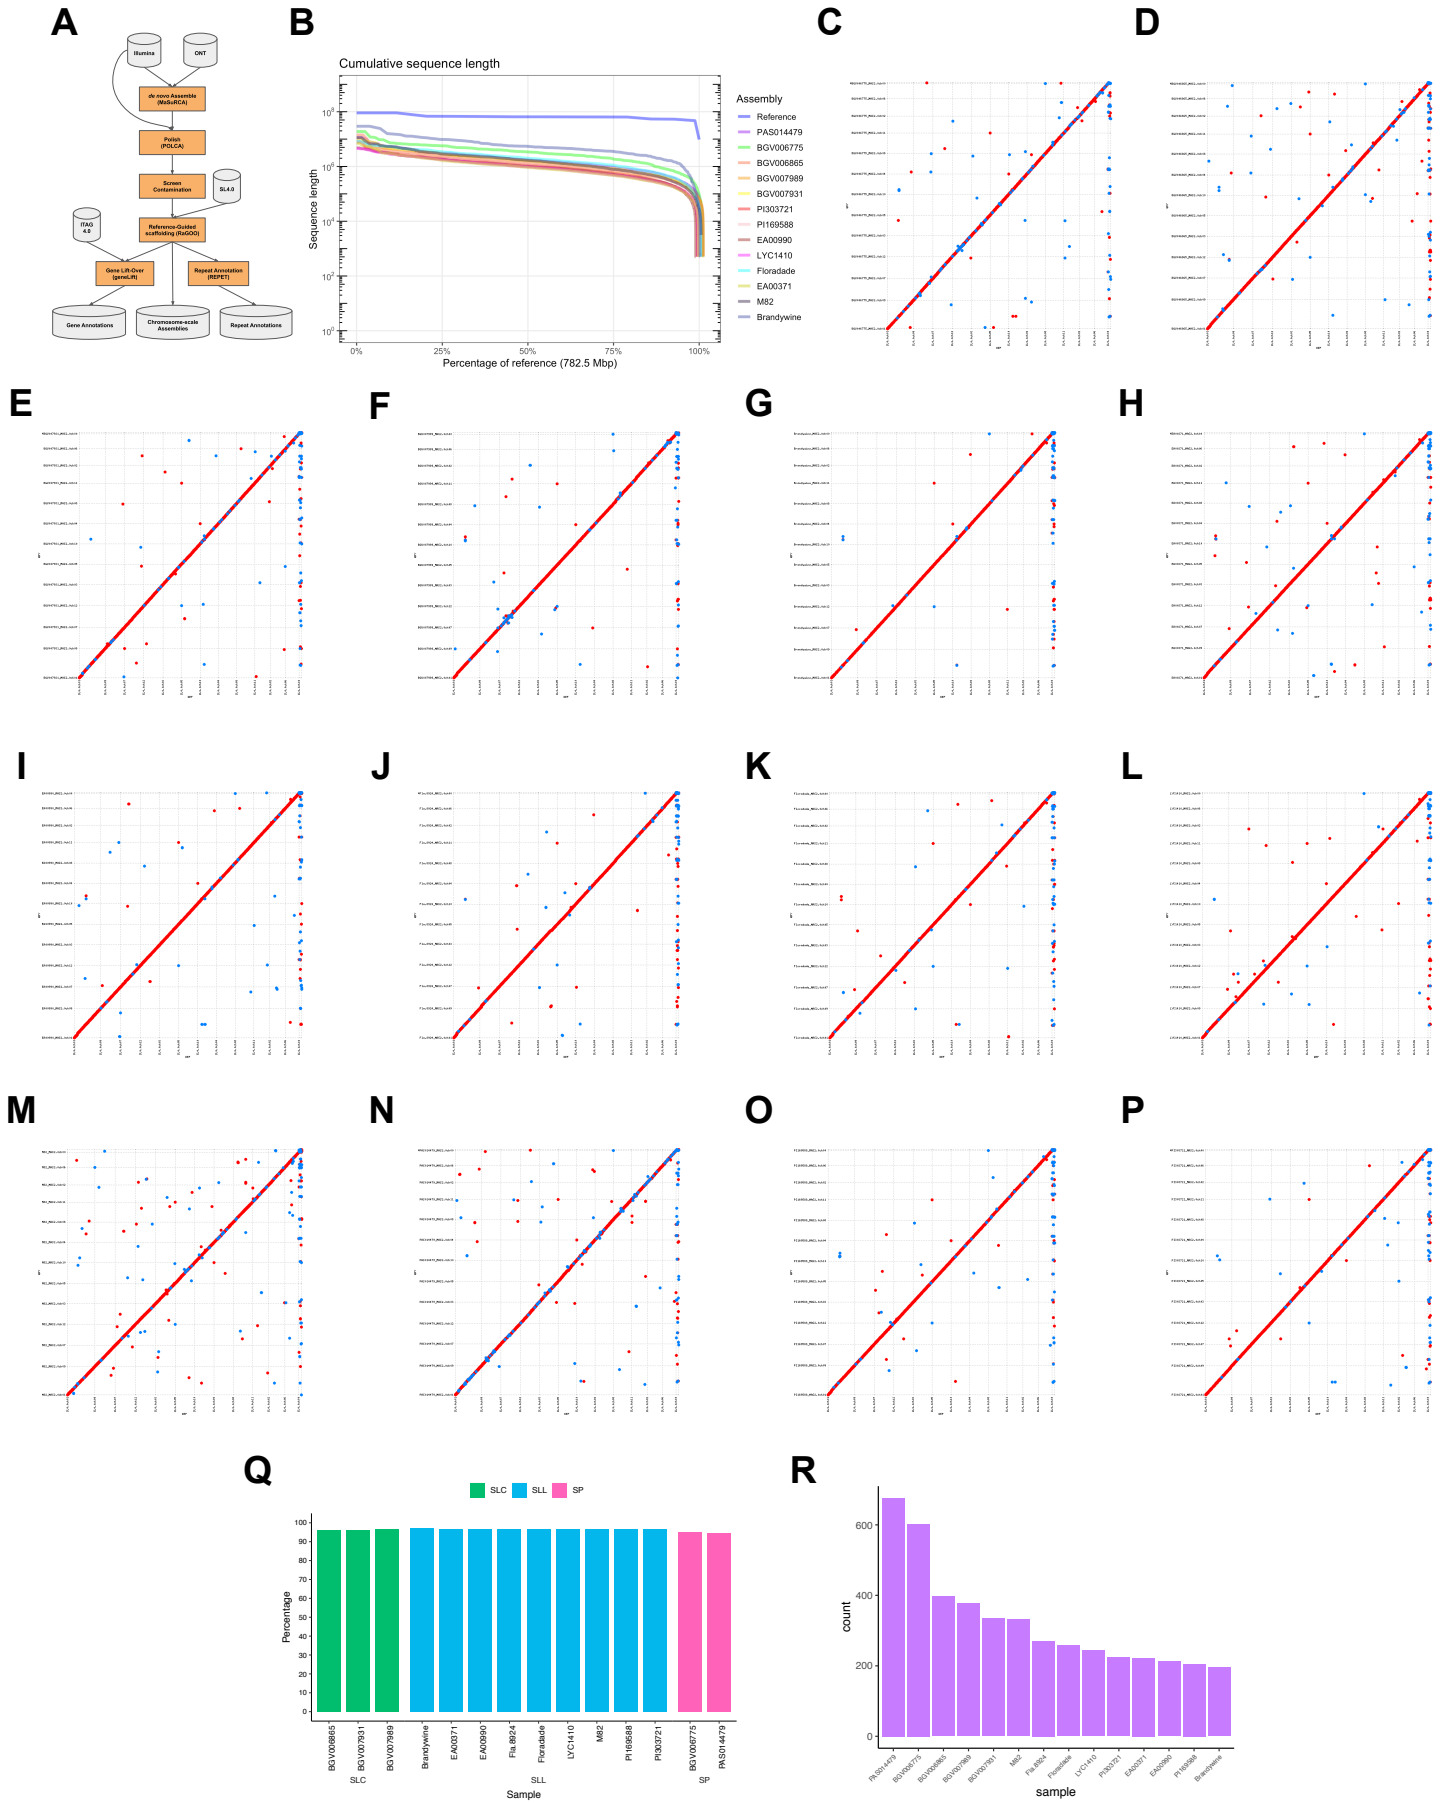

Supplement: NIHMS1595122-supplement-2.pdf [file NIHMS1595122-supplement-2.pdf]

Figure S3

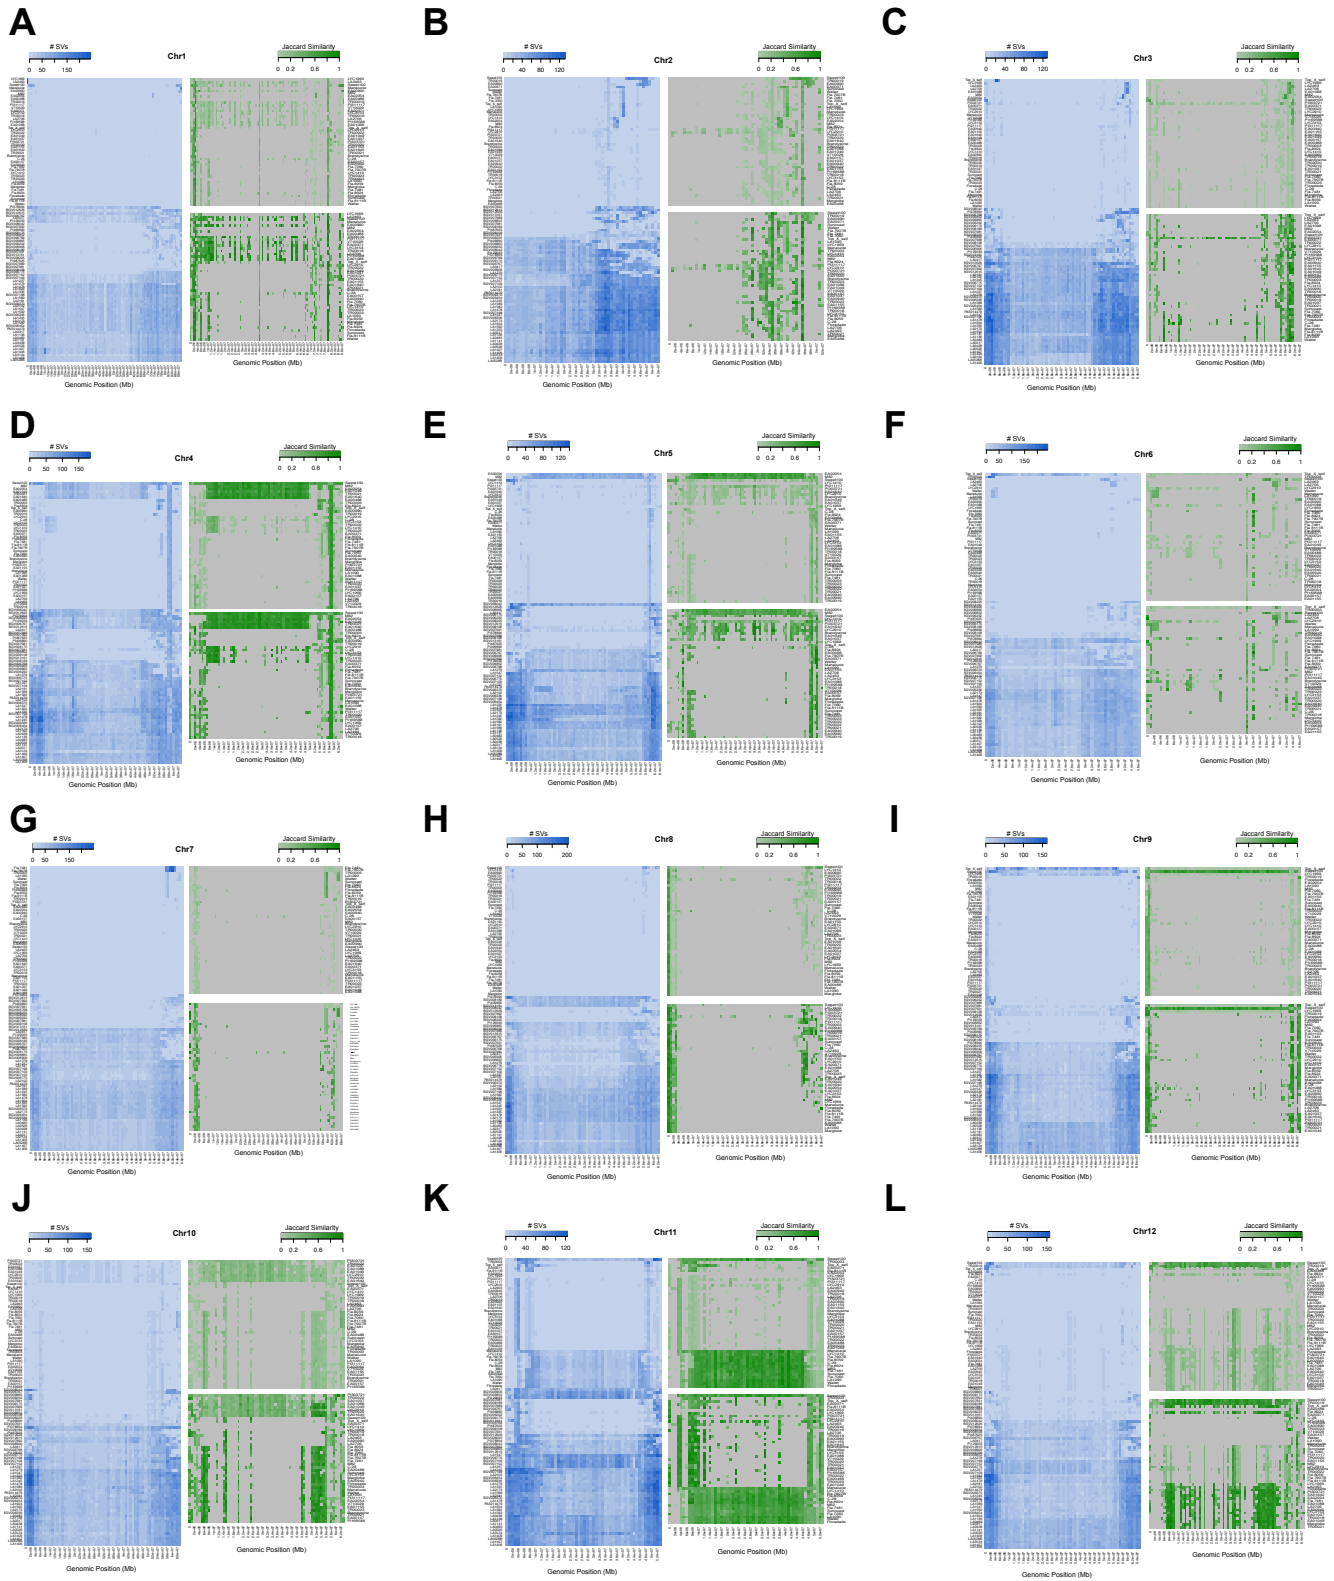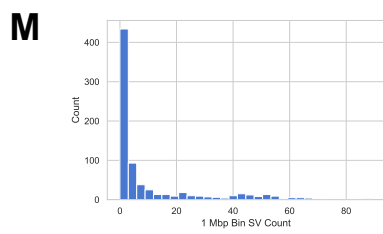

Supplement: NIHMS1595122-supplement-3.pdf [file NIHMS1595122-supplement-3.pdf]

# Figure S4

## A

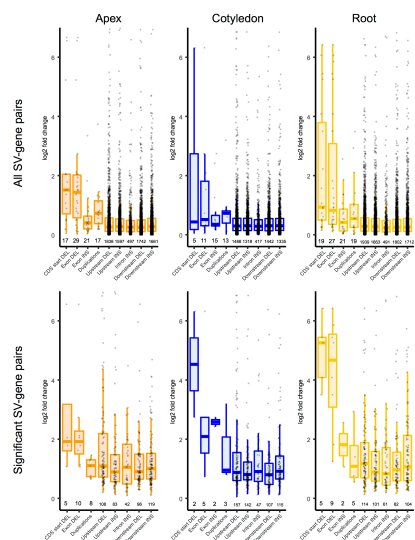

## B

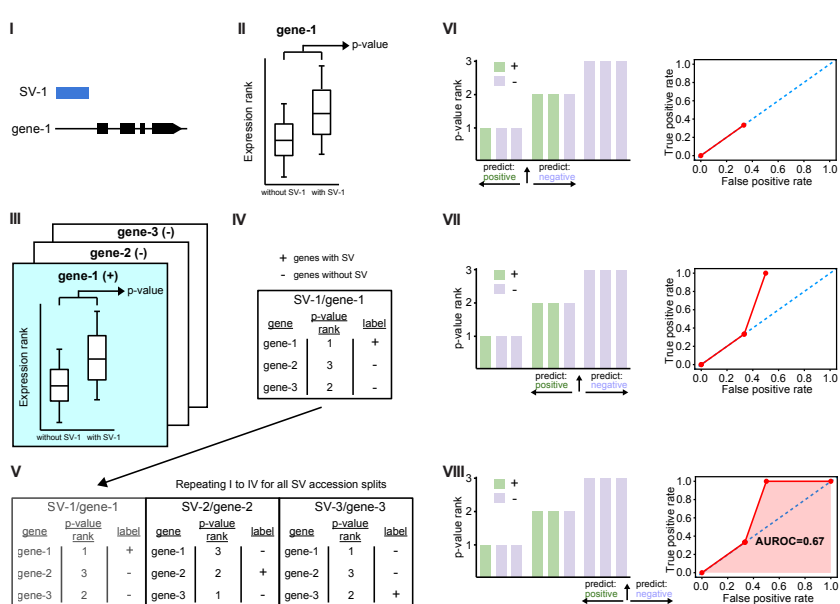

## C

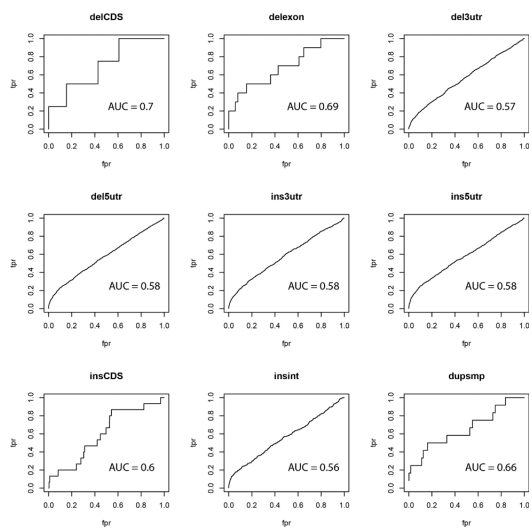

## D

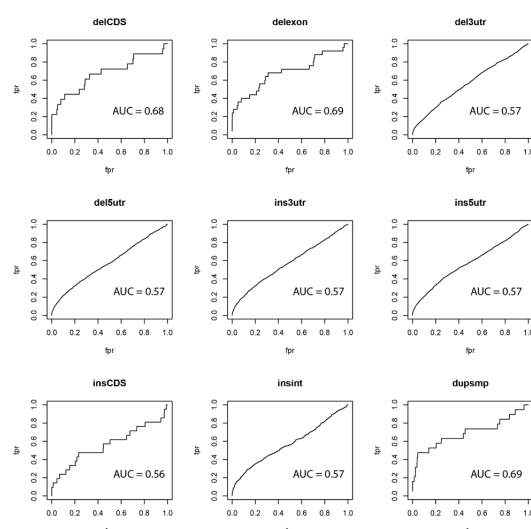

## E

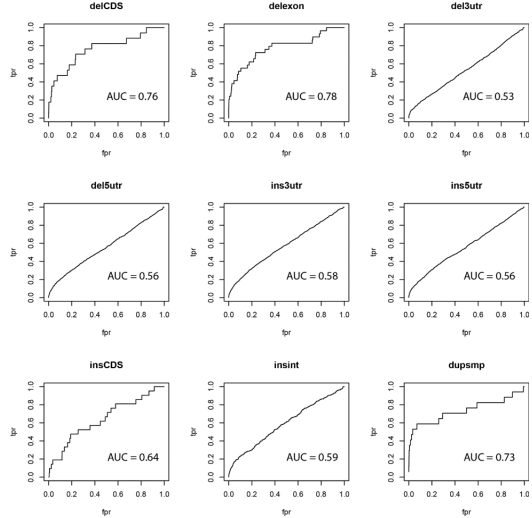

## F

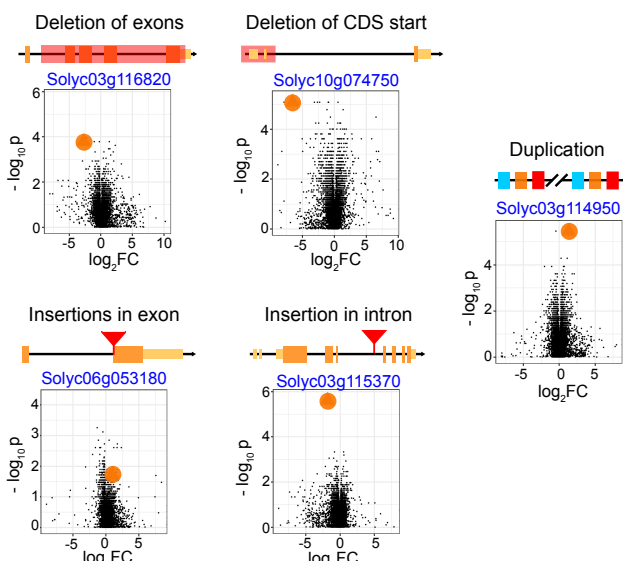

Supplement: NIHMS1595122-supplement-4.pdf [file NIHMS1595122-supplement-4.pdf]
